# Supplementary material for: A Comparative Study for Detection of EGFR Mutations in Plasma Cell-Free DNA in Korean Clinical Diagnostic Laboratories
Source: Hindawi journal article supplement (doi:10.1155/2018/7392419), 2018-01-01
Supplement: f1 [file 7392419.f1.pdf]

## Supplementary materials

Supplementary Figure S1. Workflow of the pilot external quality assurance scheme.

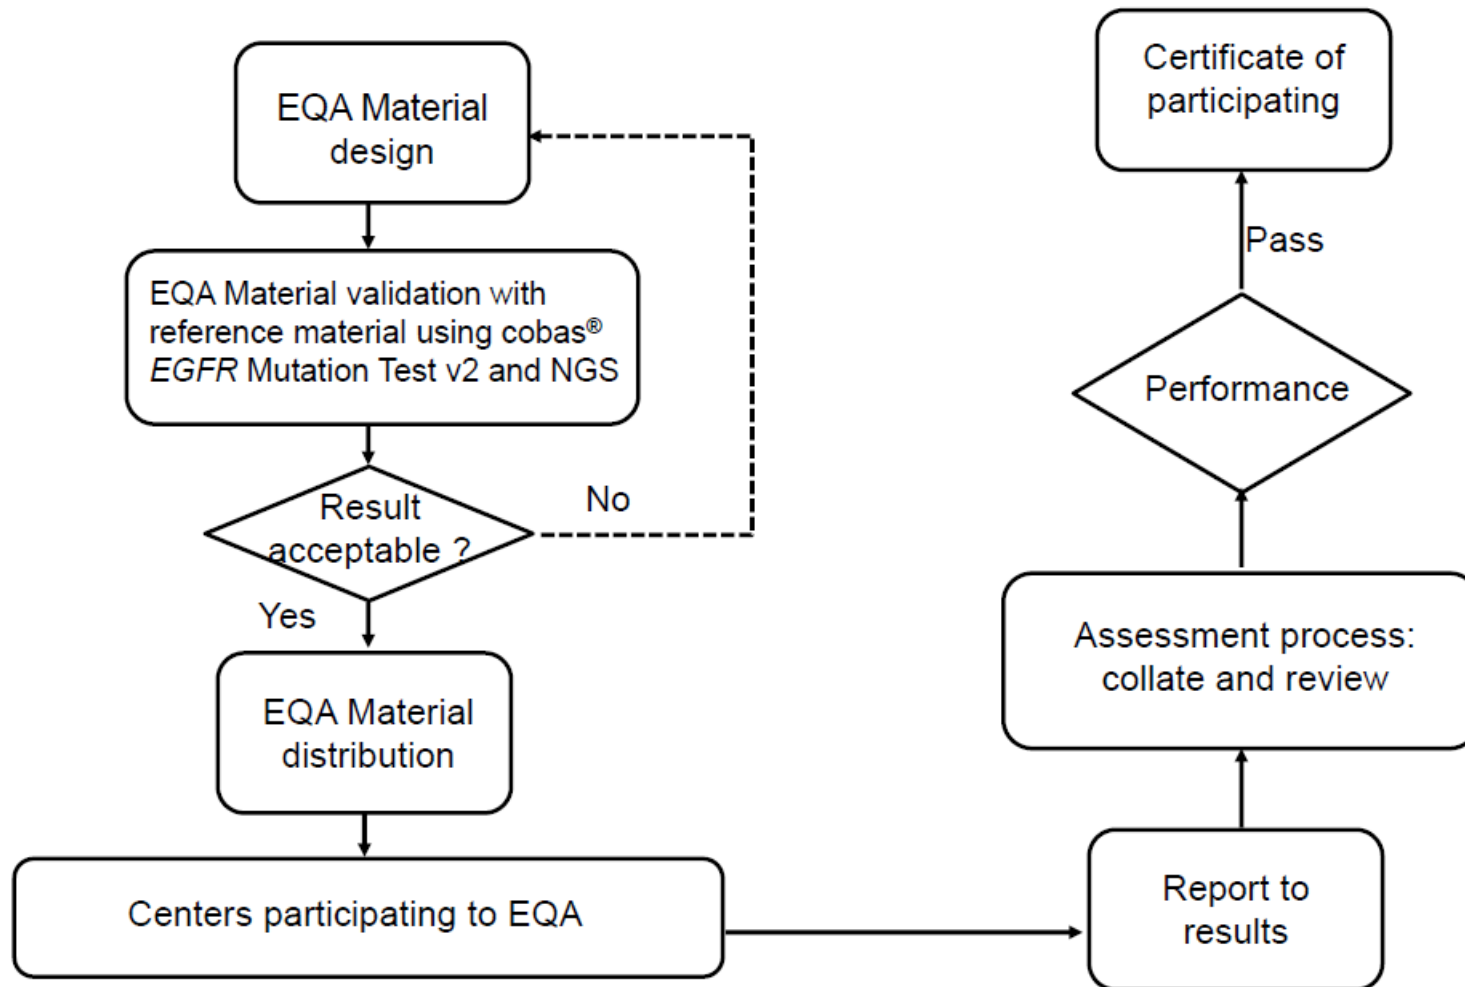

**Supplementary Figure S2.** Electropherograms of DNA sheared by ultrasonication and run on an Agilent D1000 ScreenTape System.

Sheared genomic DNA from wild-type and (a) the *EGFR* p.T790M reference standard and (b) the *EGFR* p.L858R reference standard.

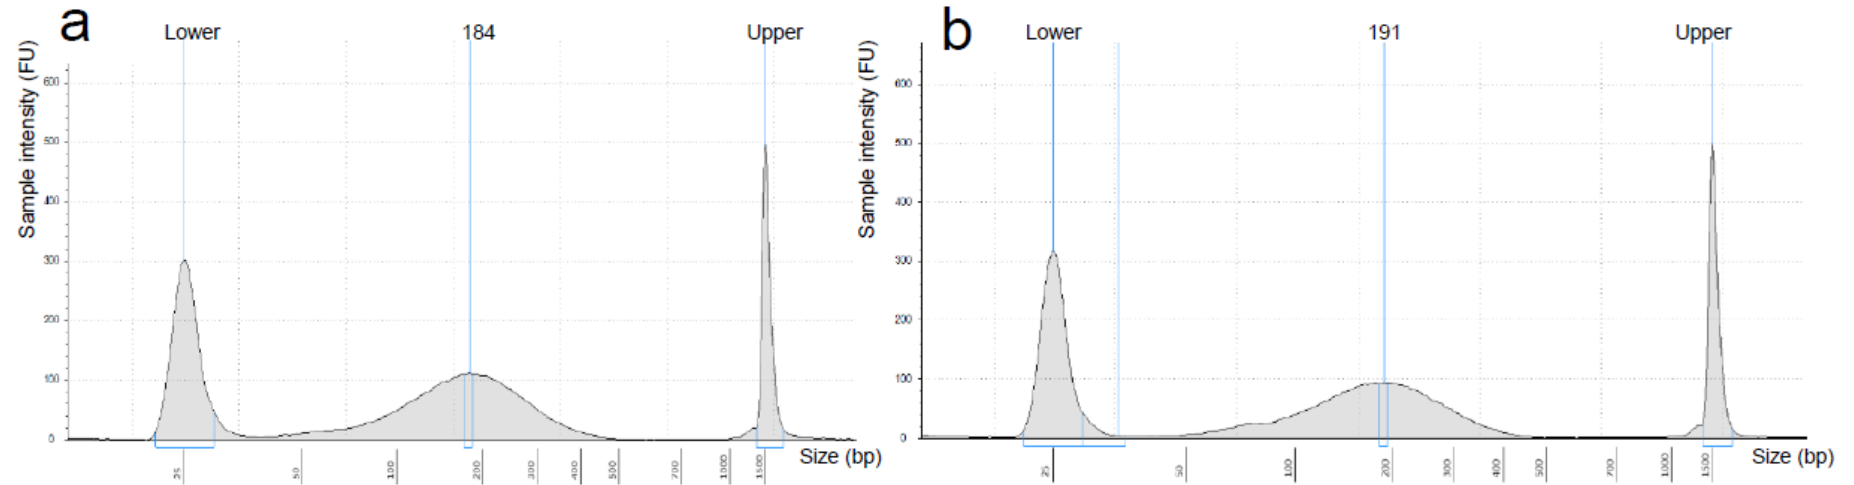

**Supplementary Table S1.** External quality assurance material for evaluation of limit of detection

| EQA materials | Reference Materials                               | Gene        | Variant        | Allele frequency (%) <sup>a</sup> | Copies of wild type DNA per $\mu\text{L}$ <sup>a</sup> | Copies of mutant DNA per $\mu\text{L}$ <sup>a</sup> | Spiked NHP (2 mL) <sup>b</sup> of             |                               |                                            |
|---------------|---------------------------------------------------|-------------|----------------|-----------------------------------|--------------------------------------------------------|-----------------------------------------------------|-----------------------------------------------|-------------------------------|--------------------------------------------|
|               |                                                   |             |                |                                   |                                                        |                                                     | Expected copies of wild type DNA <sup>c</sup> | Expected copies of mutant DNA | The total fragmented DNA (ng) <sup>d</sup> |
| Level 1       | 5% Multiplex I cfDNA Reference Standard (HD777)   | <i>EGFR</i> | p.L858R        | 4.59                              | 7904                                                   | 380                                                 | 16970                                         | 760                           | 80.18                                      |
|               |                                                   |             | p.E746_A750del | 5.77                              | 4896                                                   | 300                                                 | 10954                                         | 600                           |                                            |
|               |                                                   |             | p.T790M        | 4.52                              | 4440                                                   | 210                                                 | 10042                                         | 420                           |                                            |
|               |                                                   |             | p.A767_V769dup | 4.39                              | 3944                                                   | 181                                                 | 9050                                          | 362                           |                                            |
| Level 2       | 2.5% Spiked Standard (HD777: WT100% = 1 : 1)      | <i>EGFR</i> | p.L858R        | 2.29                              | 8140                                                   | 190                                                 | 17442                                         | 380                           | 60.42                                      |
|               |                                                   |             | p.E746_A750del | 2.89                              | 4936                                                   | 150                                                 | 11034                                         | 300                           |                                            |
|               |                                                   |             | p.T790M        | 2.26                              | 4428                                                   | 105                                                 | 10018                                         | 210                           |                                            |
|               |                                                   |             | p.A767_V769dup | 2.19                              | 3988                                                   | 91                                                  | 9138                                          | 181                           |                                            |
| Level 3       | 1% Multiplex I cfDNA Reference Standard (HD778)   | <i>EGFR</i> | p.L858R        | 0.85                              | 8144                                                   | 70                                                  | 17450                                         | 140                           | 68.02                                      |
|               |                                                   |             | p.E746_A750del | 1.24                              | 4296                                                   | 54                                                  | 9754                                          | 108                           |                                            |
|               |                                                   |             | p.T790M        | 0.93                              | 3848                                                   | 36                                                  | 8858                                          | 72                            |                                            |
|               |                                                   |             | p.A767_V769dup | 0.84                              | 3672                                                   | 31                                                  | 8506                                          | 62                            |                                            |
| Level 4       | 0.1% Multiplex I cfDNA Reference Standard (HD779) | <i>EGFR</i> | p.L858R        | 0.13                              | 7824                                                   | 10                                                  | 16810                                         | 20                            | 65.74                                      |
|               |                                                   |             | p.E746_A750del | 0.11                              | 4408                                                   | 5                                                   | 9978                                          | 10                            |                                            |
|               |                                                   |             | p.T790M        | 0.13                              | 3896                                                   | 5                                                   | 8954                                          | 10                            |                                            |
|               |                                                   |             | p.A767_V769dup | 0.06                              | 3616                                                   | 2                                                   | 8394                                          | 4                             |                                            |

<sup>a</sup>Mutant allele frequency, copy number values of wild type and mutant DNA measured using digital droplet PCR were provided from manufacturer.

<sup>b</sup>1  $\mu\text{L}$  of standard DNA were mixed with 1 mL of NHP.

<sup>c</sup>1162 wide type copies per 2 mL NHP were added.

<sup>d</sup>cfDNA was extracted from 2 mL of spiked NHP using MagMAX™ Cell-Free DNA Isolation Kit (Thermo Fisher Scientific) and then the cfDNA concentration and the fragment size distribution assessed using a 2200 TapeStation Instrument (Agilent Technologies).

\* Abbreviation: EQA, external quality assurance; NHP, normal human plasma.

**Supplementary Table S2.** External quality assurance material for evaluation of precision

| EQA materials | Reference Materials                                   | Expected allele frequency <sup>a</sup> | The spiked DNA <sup>b</sup> were consists of     |                                        |                |                                                                  |                                                           | The spiked NHP <sup>e</sup> (1 mL) of                  |                               |                                               |                      |                                          |
|---------------|-------------------------------------------------------|----------------------------------------|--------------------------------------------------|----------------------------------------|----------------|------------------------------------------------------------------|-----------------------------------------------------------|--------------------------------------------------------|-------------------------------|-----------------------------------------------|----------------------|------------------------------------------|
|               |                                                       |                                        | gDNA from reference standard DNA (50ng/ $\mu$ L) | Wild type DNA ( $\mu$ L) 50ng/ $\mu$ L | Total DNA (ng) | Measured concentration of sheared DNA (ng/ $\mu$ L) <sup>c</sup> | Expected copies of wild type DNA per $\mu$ L <sup>d</sup> | Expected copies of Mutant DNA per $\mu$ L <sup>d</sup> | Expected copies of mutant DNA | Expected copies of wild type DNA <sup>f</sup> | Allele frequency (%) | Extracted total DNA (ng/mL) <sup>g</sup> |
| P-1           | <i>EGFR</i> p.T790M Reference Standard (HD258)        | 50%                                    | 10 $\mu$ L                                       | 90 $\mu$ L                             | 5000           | 33.1                                                             | 480.0                                                     | 9119.1                                                 | 1295.9                        | 25202.4                                       | 4.9                  | 74.5                                     |
| P-2           | <i>EGFR</i> p.L858R Reference Standard (HD254)        | 50%                                    | 10 $\mu$ L                                       | 90 $\mu$ L                             | 5000           | 31.2                                                             | 452.4                                                     | 8595.6                                                 | 1221.5                        | 23789.1                                       | 4.9                  | 80.2                                     |
| P-3           | <i>EGFR</i> p.E746_A750del Reference Standard (HD251) | 50%                                    | 10 $\mu$ L                                       | 90 $\mu$ L                             | 5000           | 38.4                                                             | 556.8                                                     | 10579.2                                                | 1503.4                        | 29144.8                                       | 4.9                  | 79.5                                     |

<sup>a</sup>Expected mutant allelic frequency were measured using digital droplet PCR were provided from manufacturer.

<sup>b</sup>Spiked DNA was fragmented to about 180 ~190 bp by sonication using a Covaris M220 (Covaris Inc.).

<sup>c</sup>The concentration of sheared DNA which was distributed between 100 bp and 300 bp was assessed using a 2200 TapeStation Instrument (Agilent Technologies).

<sup>d</sup>Copies per ng were 290.

<sup>e</sup>2.7  $\mu$ L of spiked DNA were mixed with 1 mL of NHP.

<sup>f</sup>581 wild type copies per 1 mL NHP were added.

<sup>g</sup>cfDNA was extracted from 1 mL of spiked NHP using MagMAX™ Cell-Free DNA Isolation Kit (Thermo Fisher Scientific) and then the concentration of sheared DNA which was distributed between 100 bp and 300 bp was assessed using a 2200 TapeStation Instrument (Agilent Technologies).

\* Abbreviation: EQA, external quality assurance; NHP, normal human plasma.

**Supplementary Table S3.** Preparation material for performance evaluation

| Materials | Reference Materials                               | Gene        | Variant        | Allele frequency (%) <sup>a</sup> | Copies of wild type DNA per $\mu\text{L}^a$ | Copies of mutant DNA per $\mu\text{L}^a$ | Spiked NHP (2 mL) <sup>b</sup> of             |                               |                                      |
|-----------|---------------------------------------------------|-------------|----------------|-----------------------------------|---------------------------------------------|------------------------------------------|-----------------------------------------------|-------------------------------|--------------------------------------|
|           |                                                   |             |                |                                   |                                             |                                          | Expected copies of wild type DNA <sup>c</sup> | Expected copies of mutant DNA | Expected mutant allele frequency (%) |
| Test 1    | 5% Multiplex I cfDNA Reference Standard (HD777)   | <i>EGFR</i> | p.L858R        | 4.59                              | 7904                                        | 380                                      | 16970                                         | 760                           | 4.29                                 |
|           |                                                   |             | p.E746_A750del | 5.77                              | 4896                                        | 300                                      | 10954                                         | 600                           | 5.19                                 |
|           |                                                   |             | p.T790M        | 4.52                              | 4440                                        | 210                                      | 10042                                         | 420                           | 4.01                                 |
|           |                                                   |             | p.A767_V769dup | 4.39                              | 3944                                        | 181                                      | 9050                                          | 362                           | 3.85                                 |
| Test 2    | 2.5% Spiked Standard (HD777: WT100%=1:1)          | <i>EGFR</i> | p.L858R        | 2.29                              | 8140                                        | 190                                      | 17442                                         | 380                           | 2.13                                 |
|           |                                                   |             | p.E746_A750del | 2.89                              | 4936                                        | 150                                      | 11034                                         | 300                           | 2.65                                 |
|           |                                                   |             | p.T790M        | 2.26                              | 4428                                        | 105                                      | 10018                                         | 210                           | 2.05                                 |
|           |                                                   |             | p.A767_V769dup | 2.19                              | 3988                                        | 91                                       | 9138                                          | 181                           | 1.94                                 |
| Test 3    | 1% Multiplex I cfDNA Reference Standard (HD778)   | <i>EGFR</i> | p.L858R        | 0.85                              | 8144                                        | 70                                       | 17450                                         | 140                           | 0.80                                 |
|           |                                                   |             | p.E746_A750del | 1.24                              | 4296                                        | 54                                       | 9754                                          | 108                           | 1.10                                 |
|           |                                                   |             | p.T790M        | 0.93                              | 3848                                        | 36                                       | 8858                                          | 72                            | 0.81                                 |
|           |                                                   |             | p.A767_V769dup | 0.84                              | 3672                                        | 31                                       | 8506                                          | 62                            | 0.72                                 |
| Test 4    | 0.5% Spiked Standard (HD778: WT100%=1:1)          | <i>EGFR</i> | p.L858R        | 0.43                              | 8260                                        | 35                                       | 17682                                         | 70                            | 0.39                                 |
|           |                                                   |             | p.E746_A750del | 0.62                              | 4636                                        | 27                                       | 10434                                         | 54                            | 0.51                                 |
|           |                                                   |             | p.T790M        | 0.46                              | 4132                                        | 18                                       | 9426                                          | 36                            | 0.38                                 |
|           |                                                   |             | p.A767_V769dup | 0.42                              | 3852                                        | 15                                       | 8866                                          | 30                            | 0.34                                 |
| Test 5    | 0.1% Multiplex I cfDNA Reference Standard (HD779) | <i>EGFR</i> | p.L858R        | 0.13                              | 7824                                        | 10                                       | 16810                                         | 20                            | 0.12                                 |
|           |                                                   |             | p.E746_A750del | 0.11                              | 4408                                        | 5                                        | 9978                                          | 10                            | 0.10                                 |
|           |                                                   |             | p.T790M        | 0.13                              | 3896                                        | 5                                        | 8954                                          | 10                            | 0.11                                 |
|           |                                                   |             | p.A767_V769dup | 0.06                              | 3616                                        | 2                                        | 8394                                          | 4                             | 0.05                                 |

<sup>a</sup>Mutant allele frequency, copy number values of wild type and mutant DNA measured using digital droplet PCR were provided from manufacturer.

<sup>b</sup>1  $\mu$ L of standard DNA were mixed with 1 mL of NHP.

<sup>c</sup>1162 wild type copies per 2 mL NHP were added.
